# Supplementary material for: Combined single-cell transcriptome and immune repertoire analysis reveals hepatic and renal immune injury by heat stroke
Source: JCI journal article supplement (doi:10.1172/jci.insight.189825), 2026-03-23

Figure 7-Liver-ASC

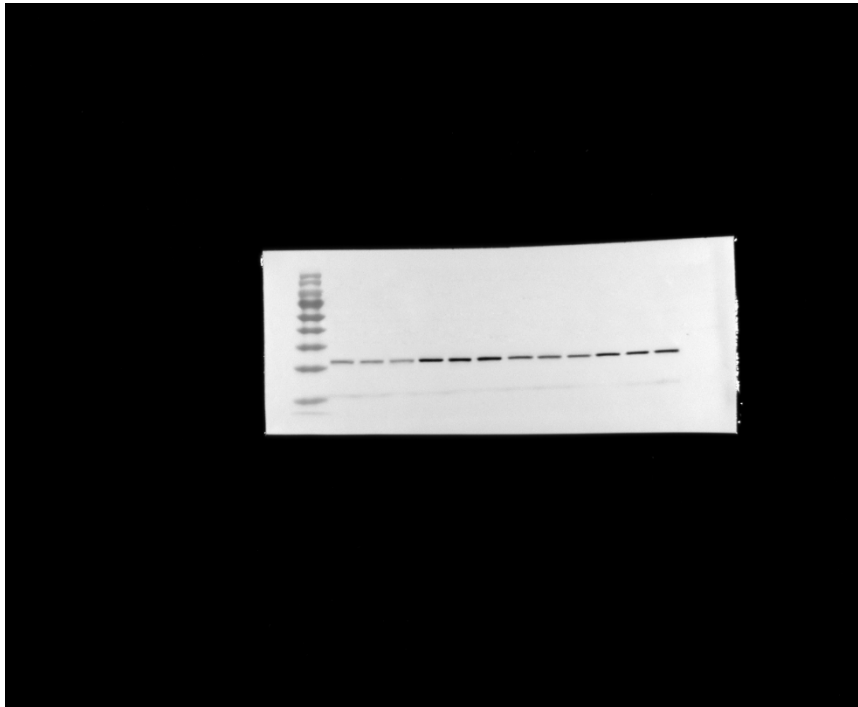

Figure 7-Liver-Caspase 1

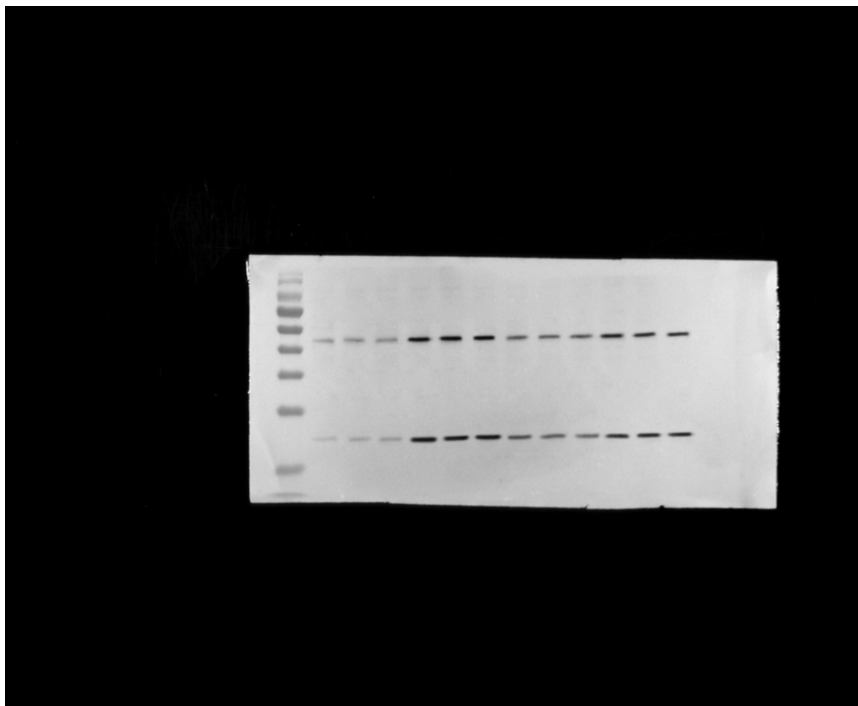

Figure 7-Liver-Caspase 11

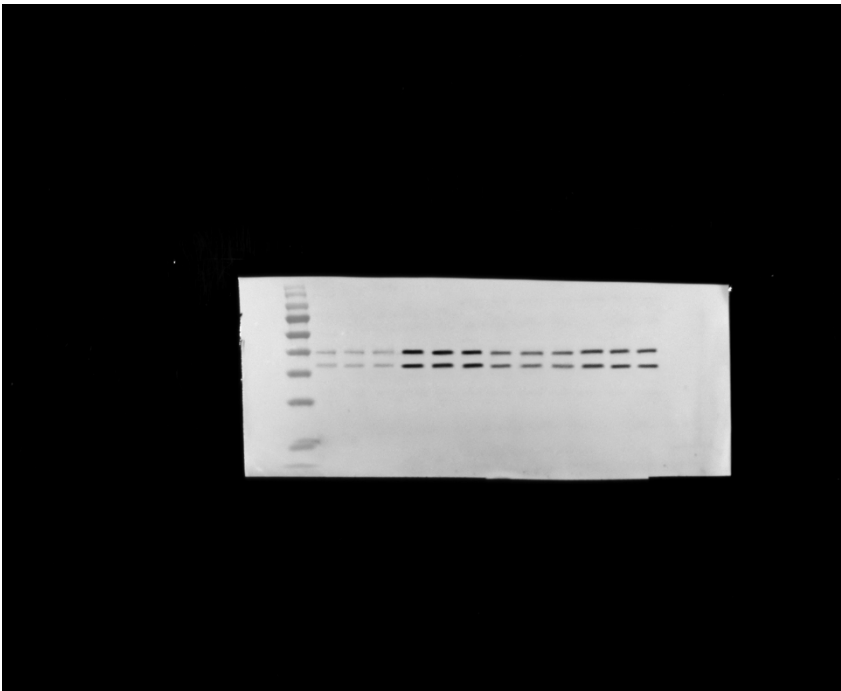

Figure 7-Liver-IL-1 $\beta$

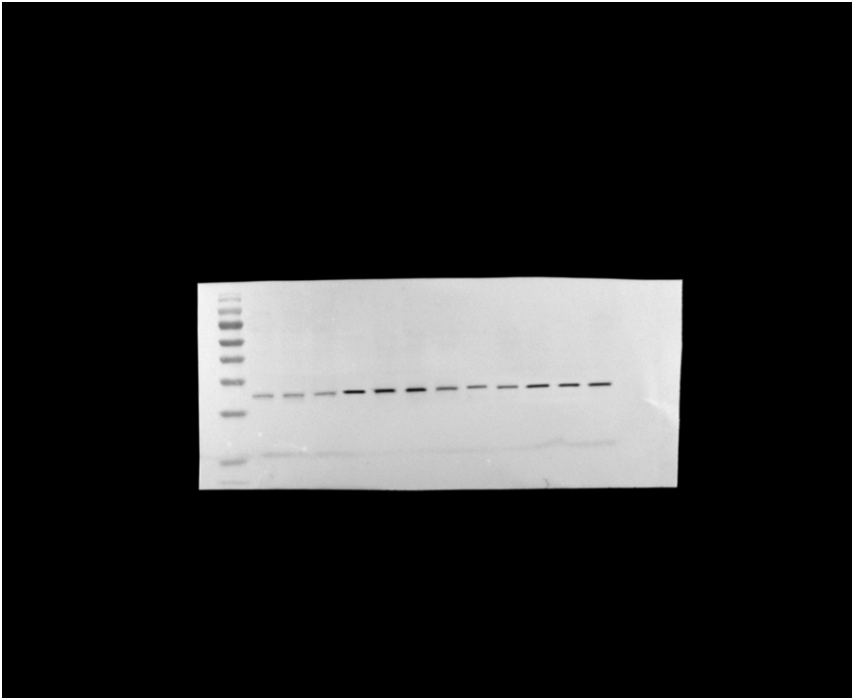

Figure 7-Liver-IL-6

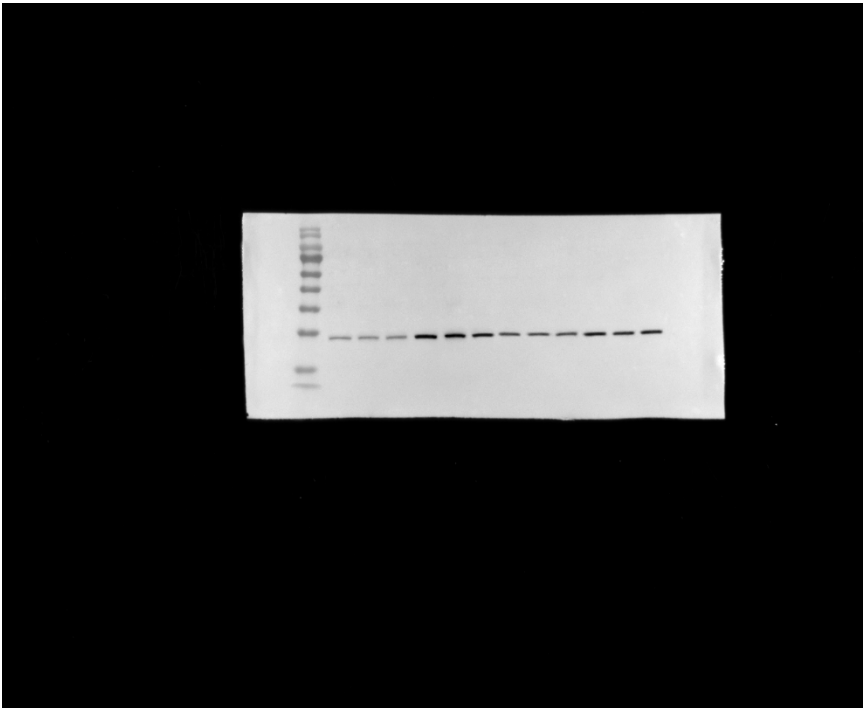

Figure 7-Liver-IL-18

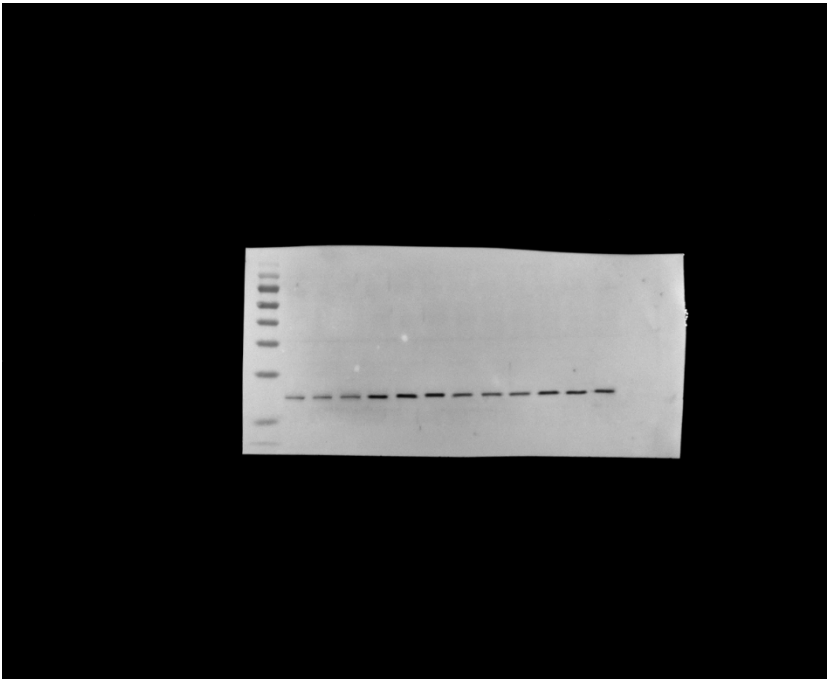

Figure 7-Liver-MCP-1

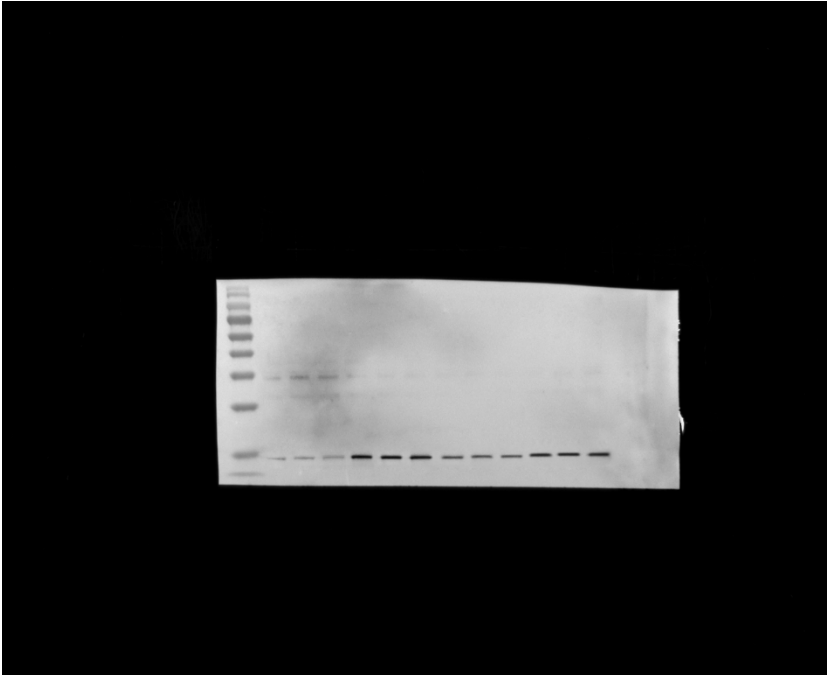

Figure 7-Liver-NLRP3

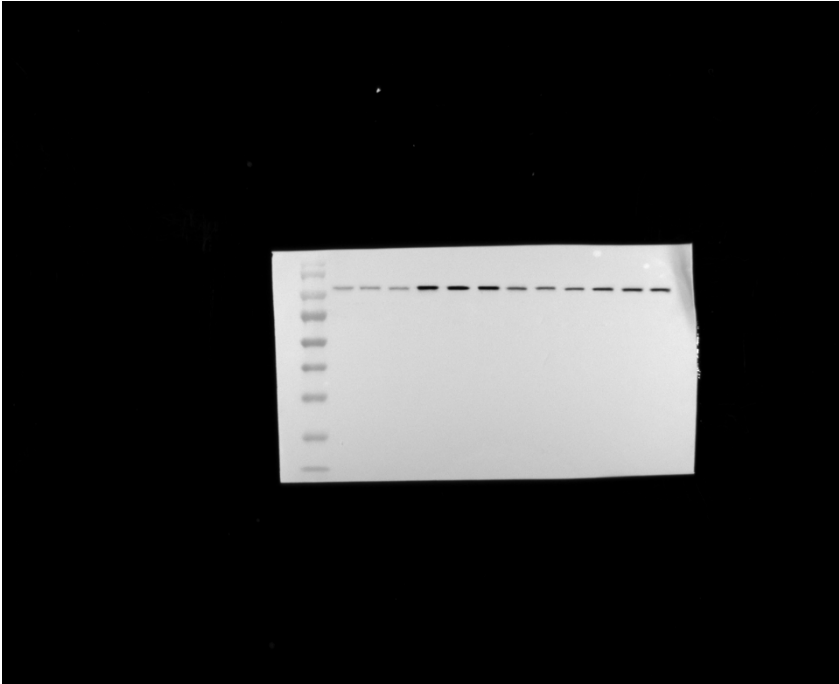

Figure 7-Liver-TLR4

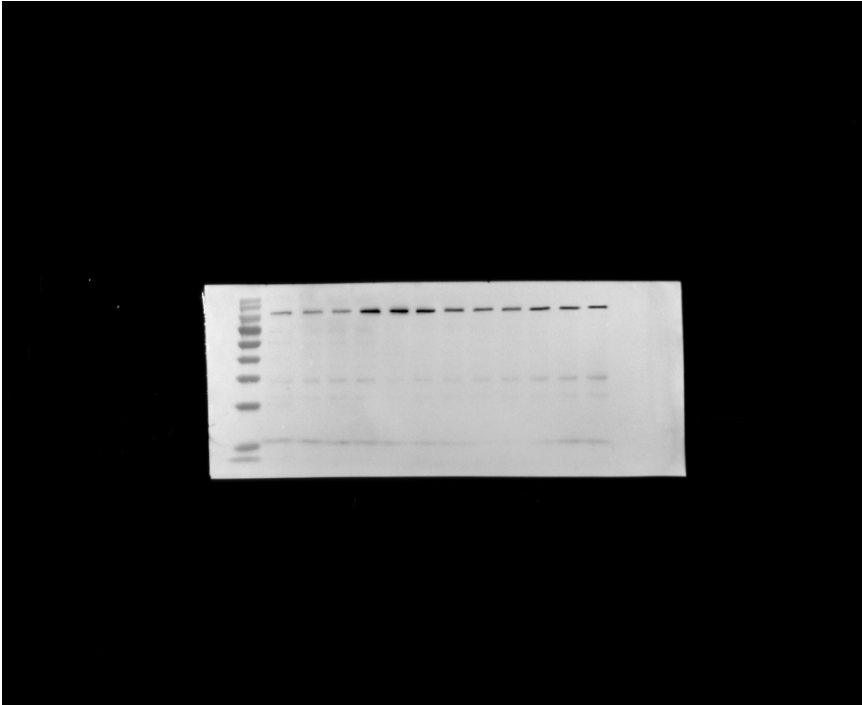

Figure 7-Liver-TNF- $\alpha$

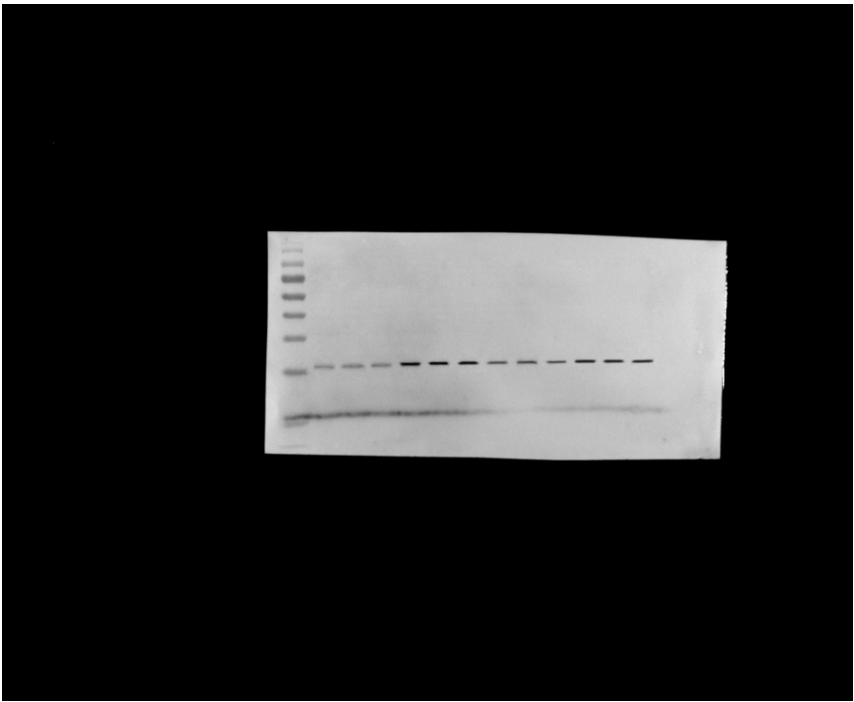

Figure 7-Liver-beta-actin

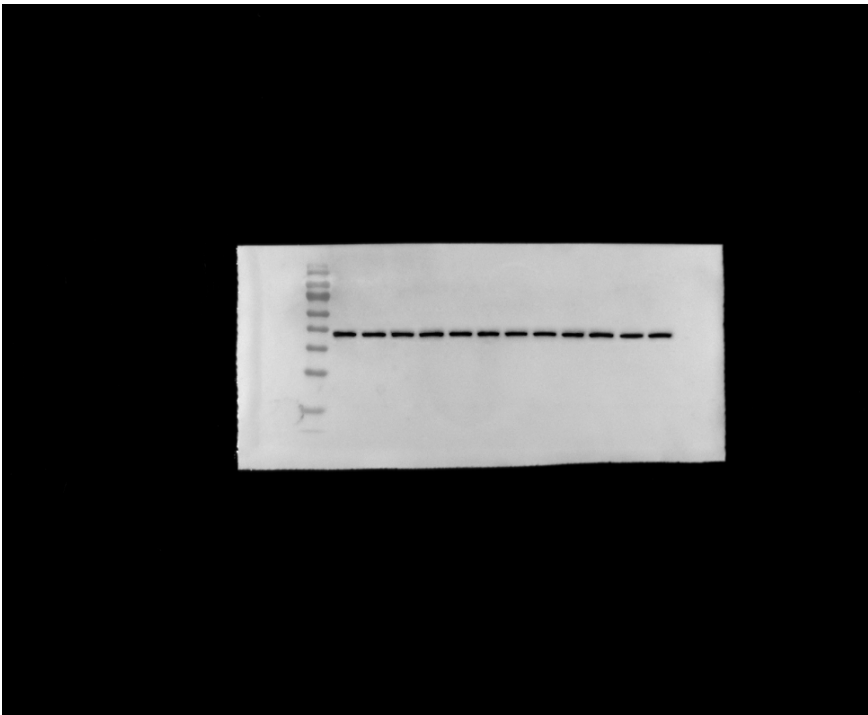

Figure 7-Liver-GSDMD

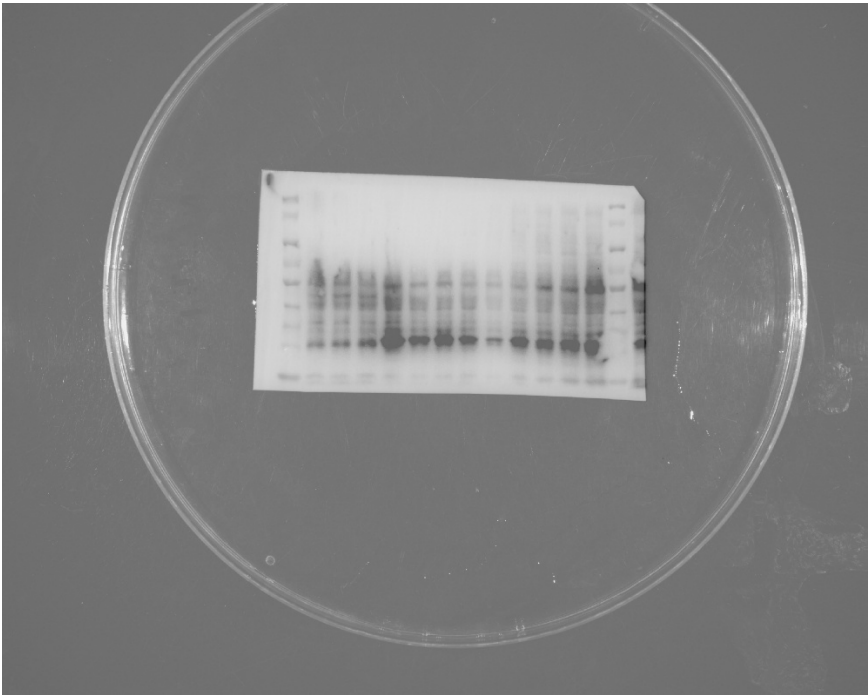

Figure S9-Kidney-ASC

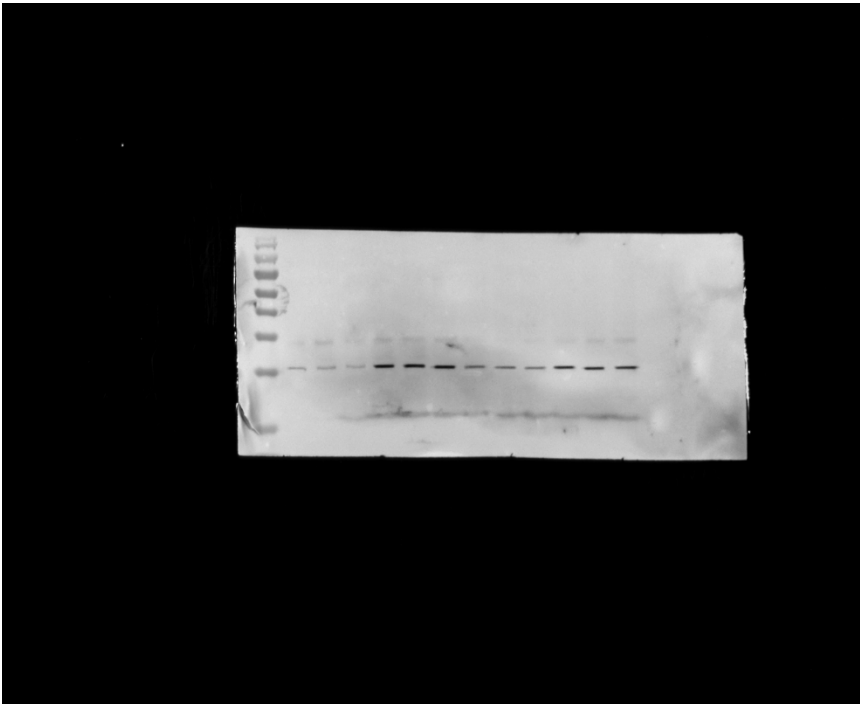

Figure S9-Kidney-Caspase 1

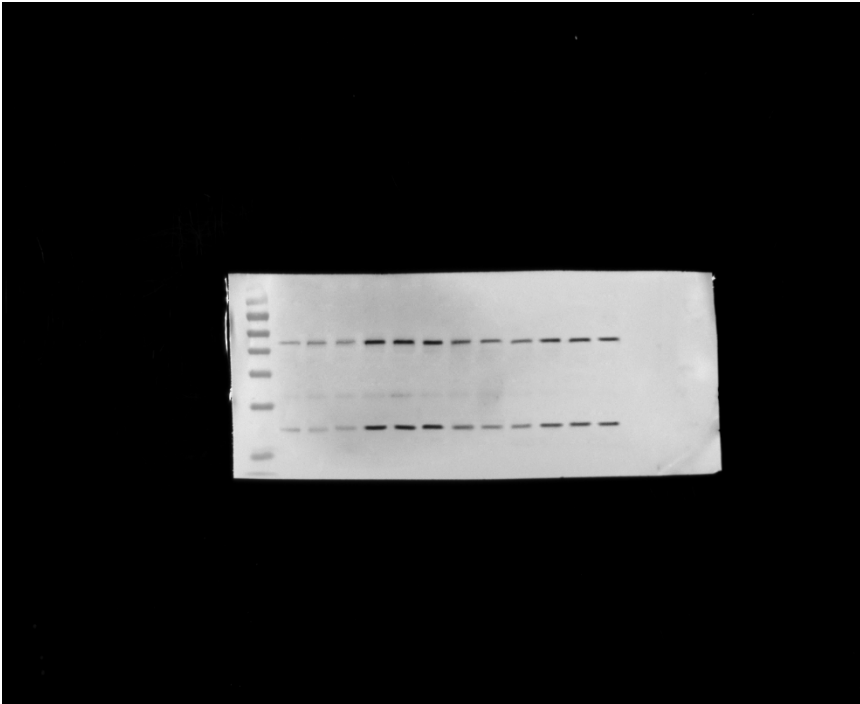

Figure S9-Kidney-Caspase 11

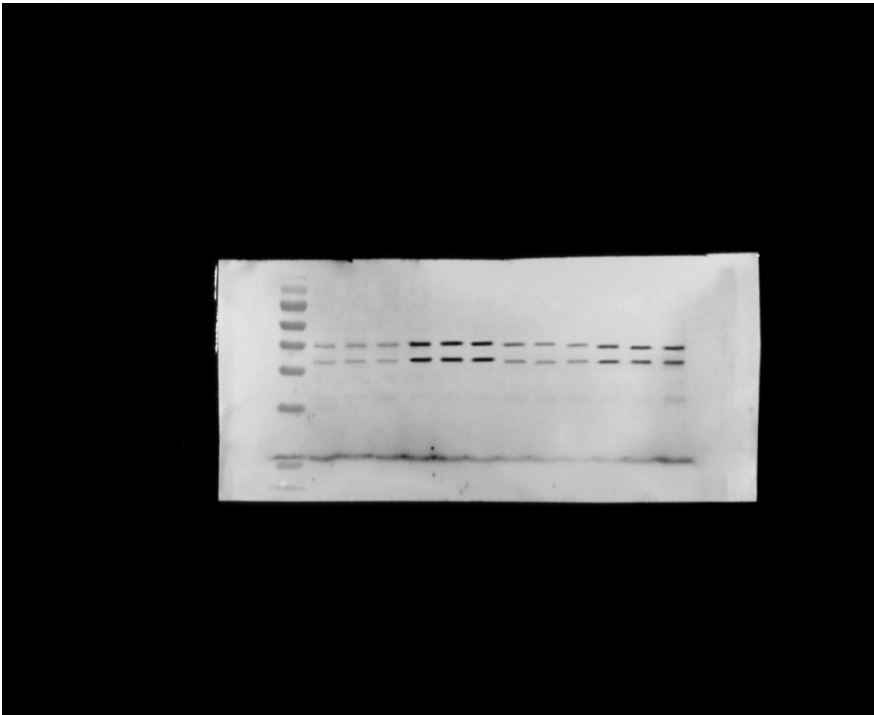

Figure S9-Kidney-GSDMD

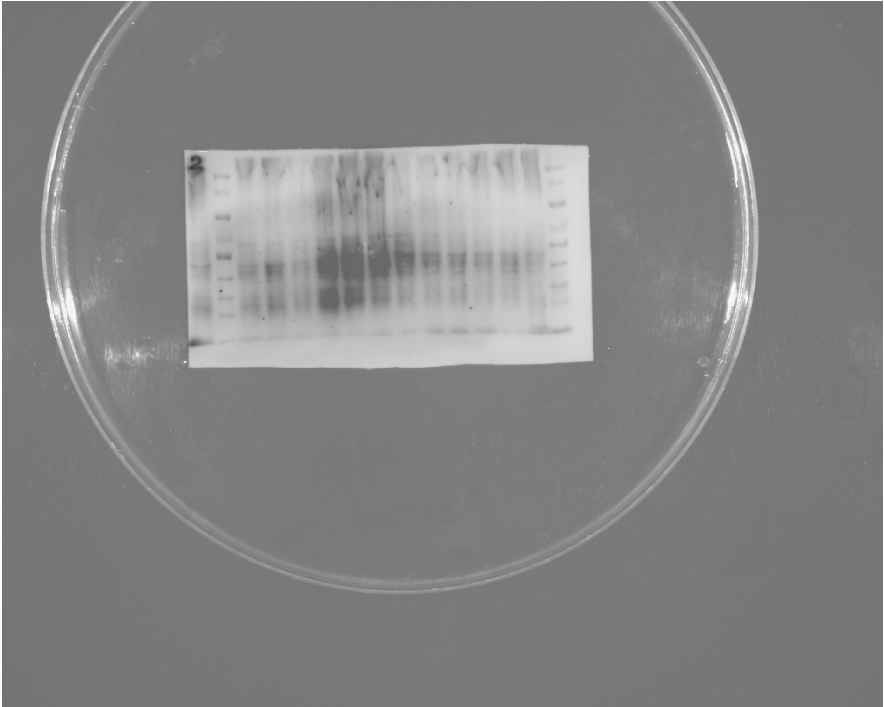

Figure S9-Kidney-IL-1 $\beta$

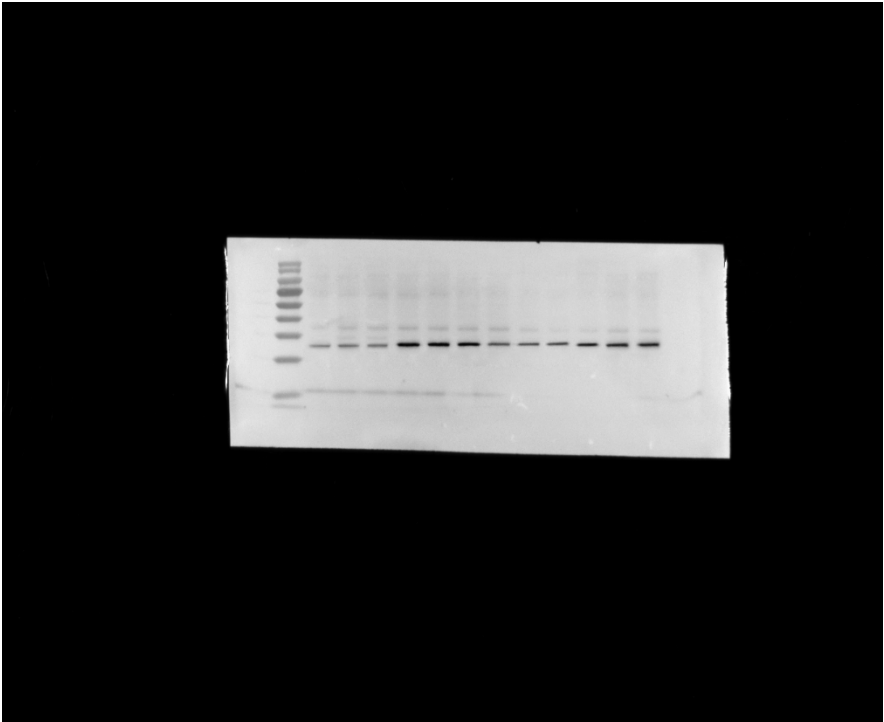

Figure S9-Kidney-IL-6

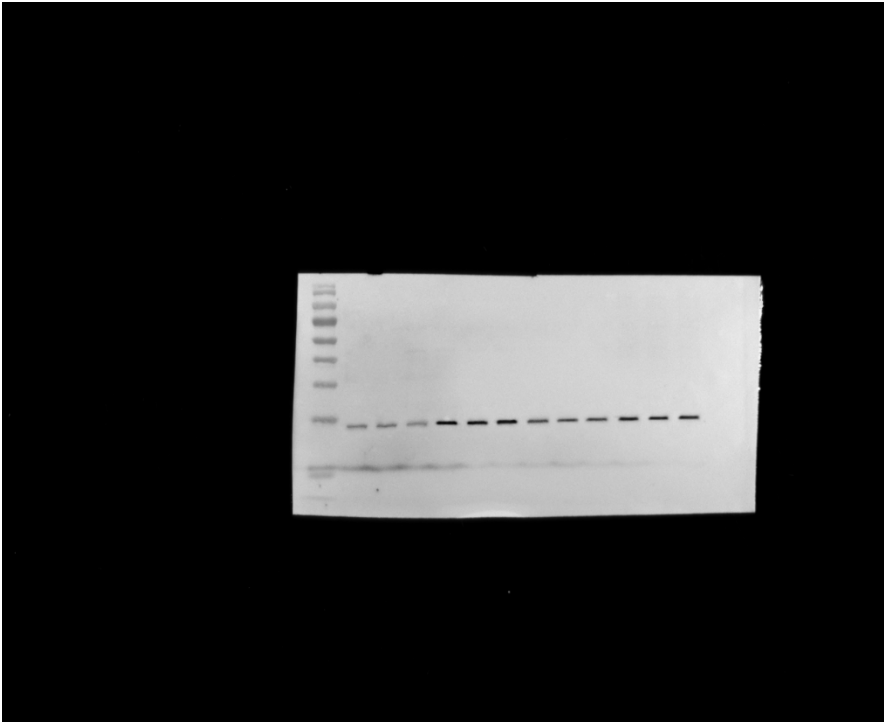

Figure S9-Kidney-IL-18

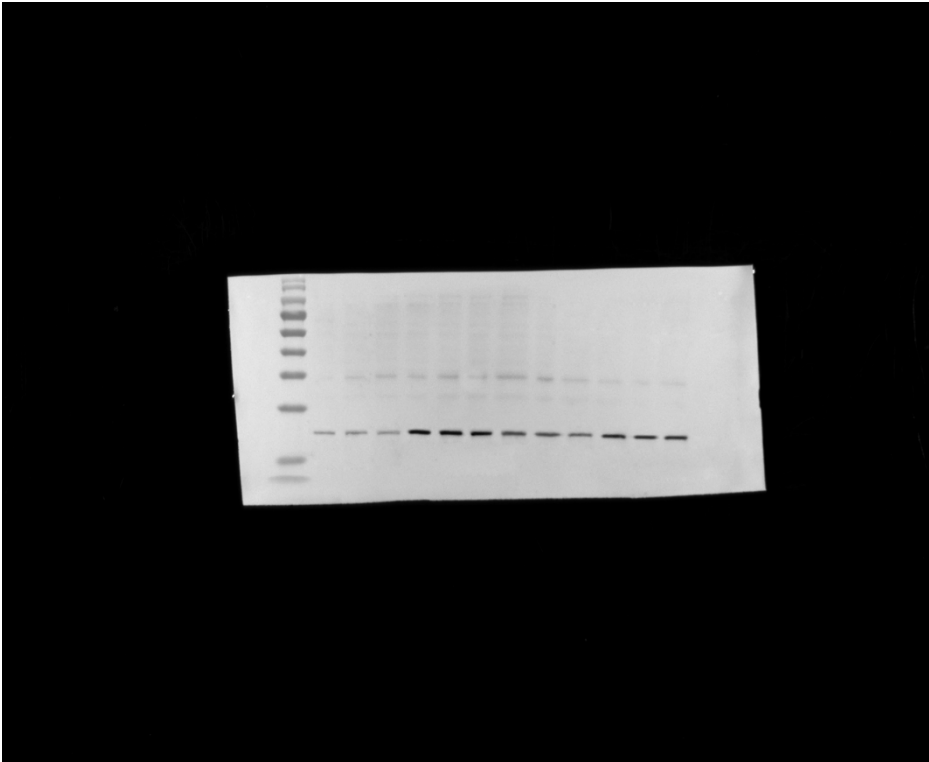

Figure S9-Kidney-MCP-1

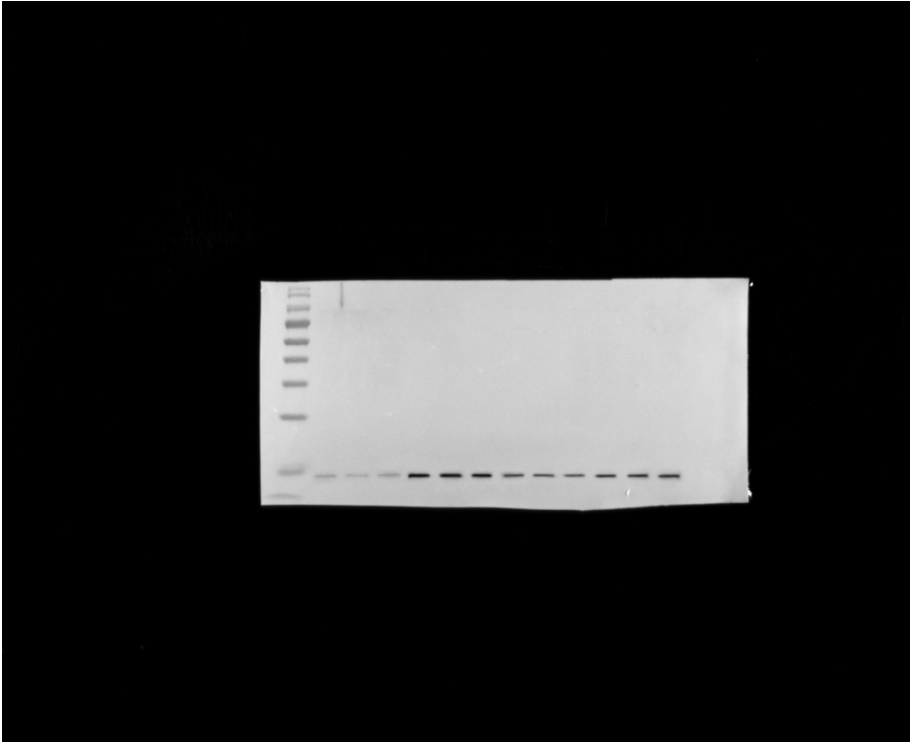

Figure S9-Kidney-NLRP3

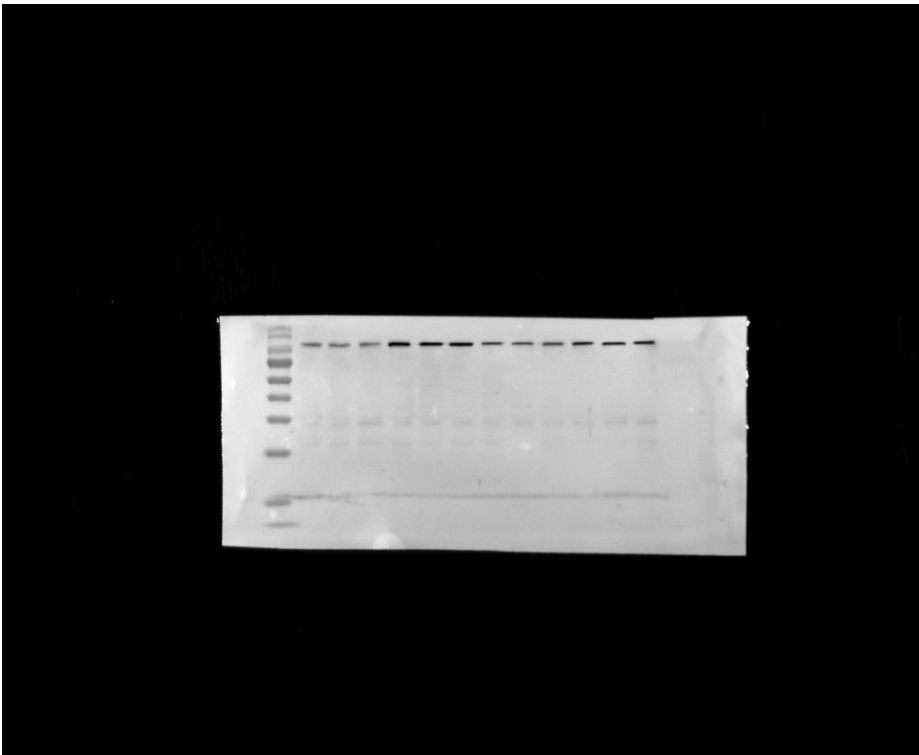

Figure S9-Kidney-TLR4

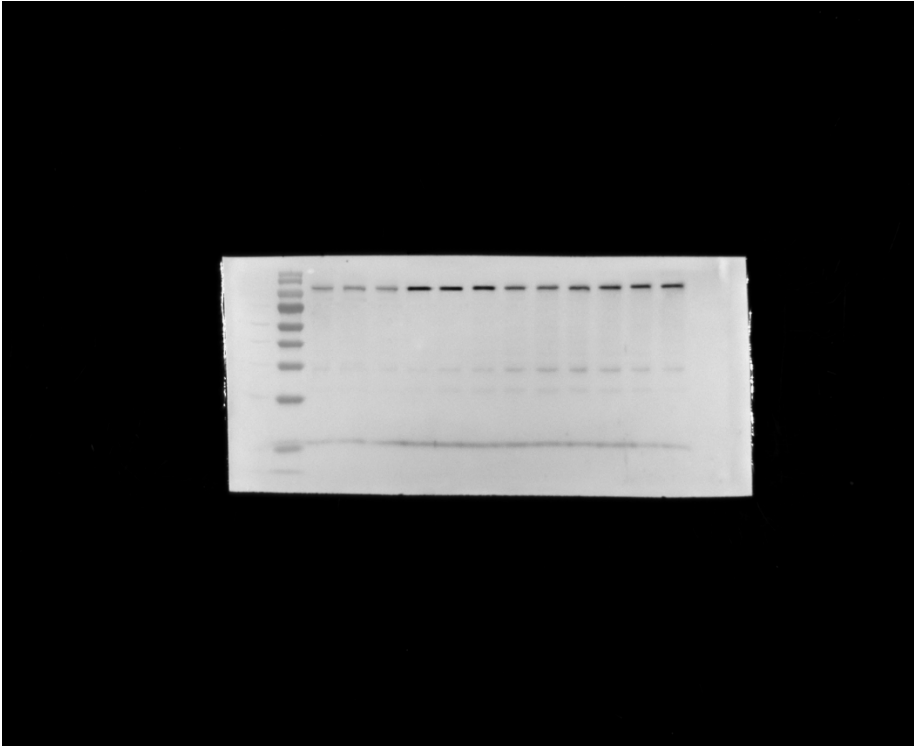

Figure S9-Kidney-TNF- $\alpha$

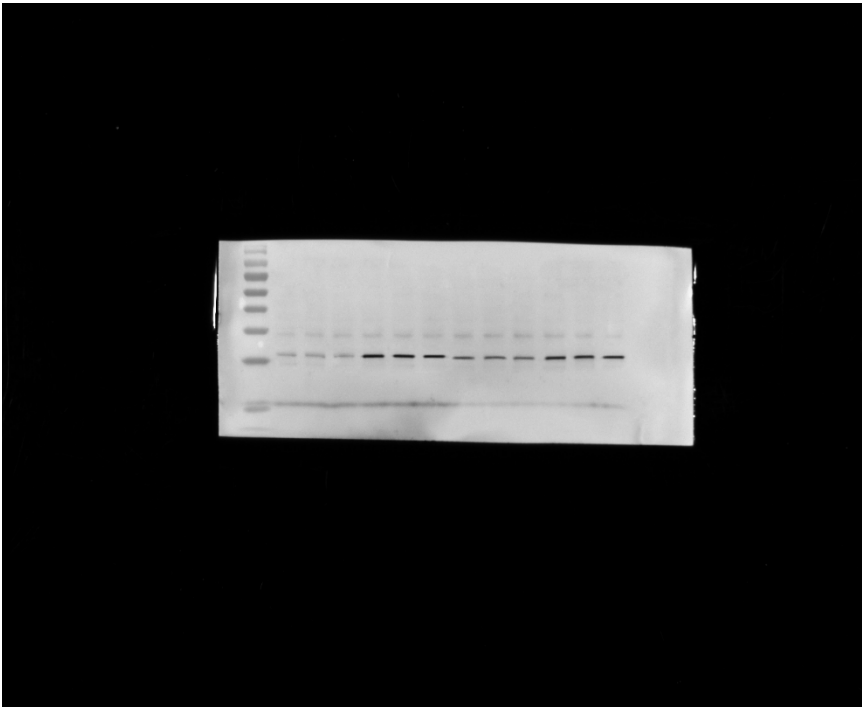

Figure S9-Kidney- $\beta$ -actin

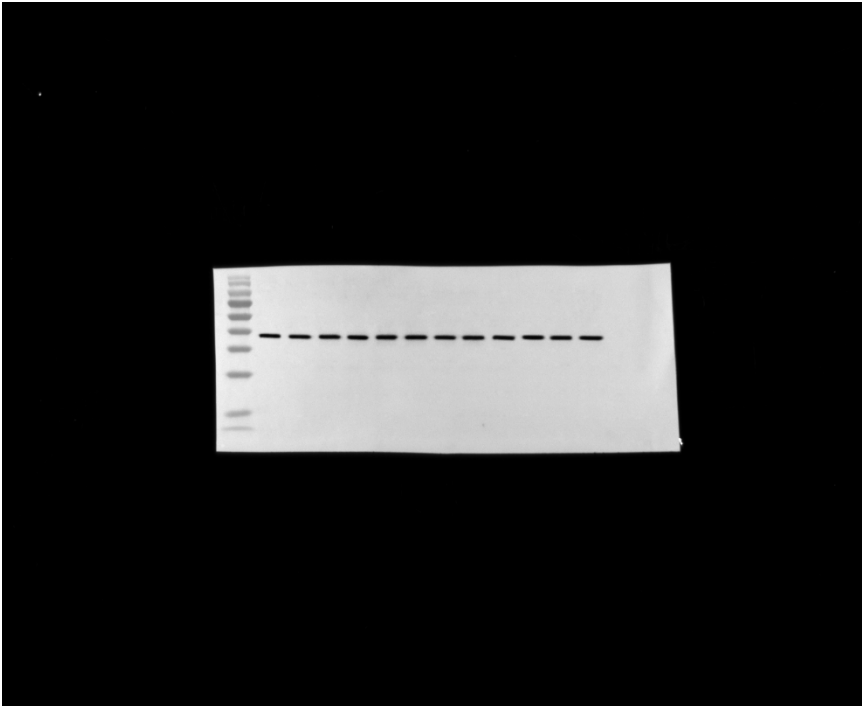

Figure S10-Liver-ZBP1

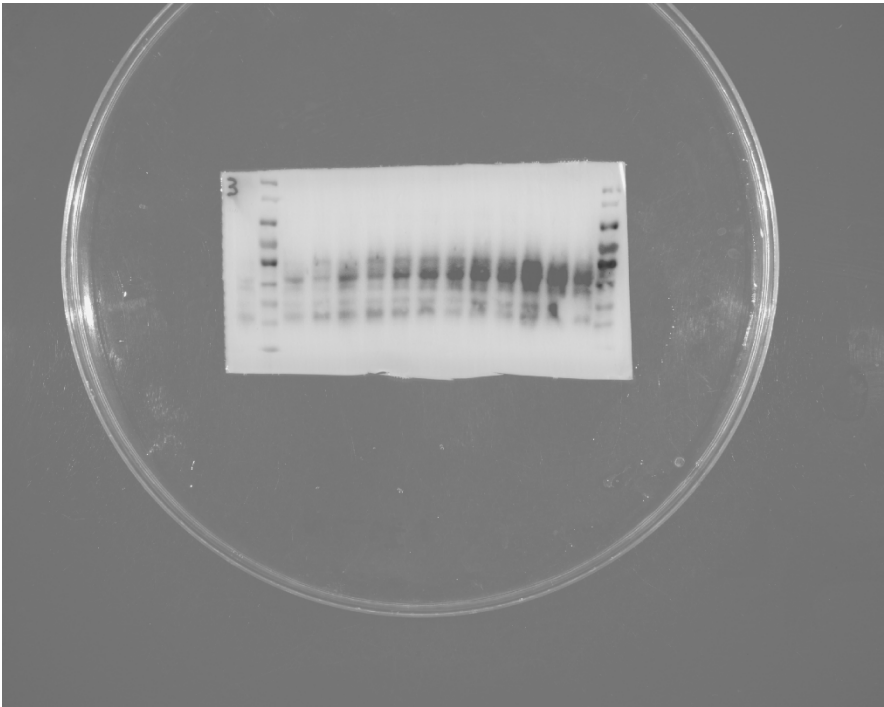

Figure S10-Liver-β-actin

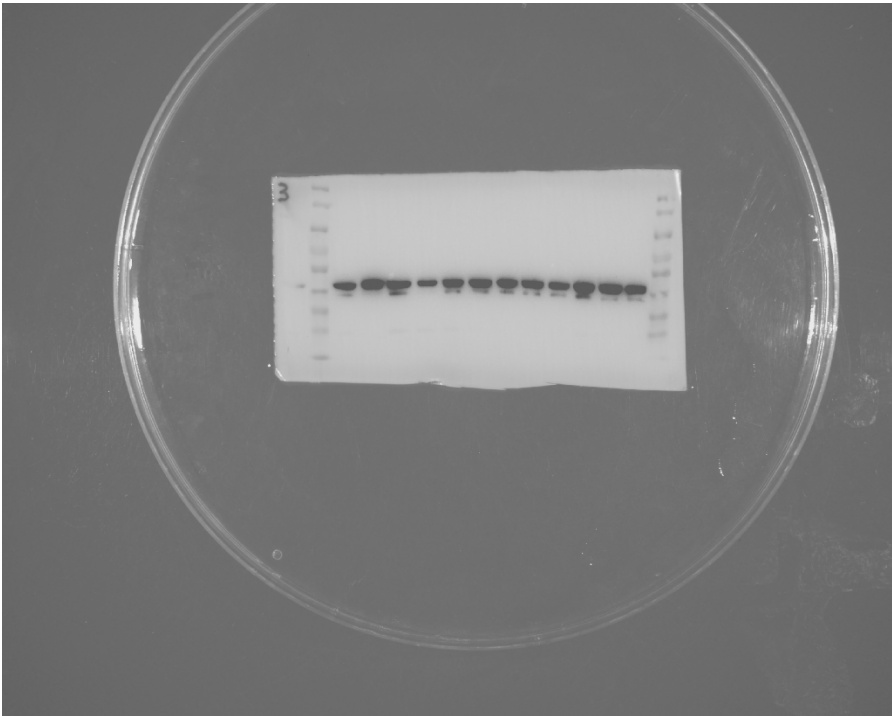

Figure S10-Kidney-ZBP1

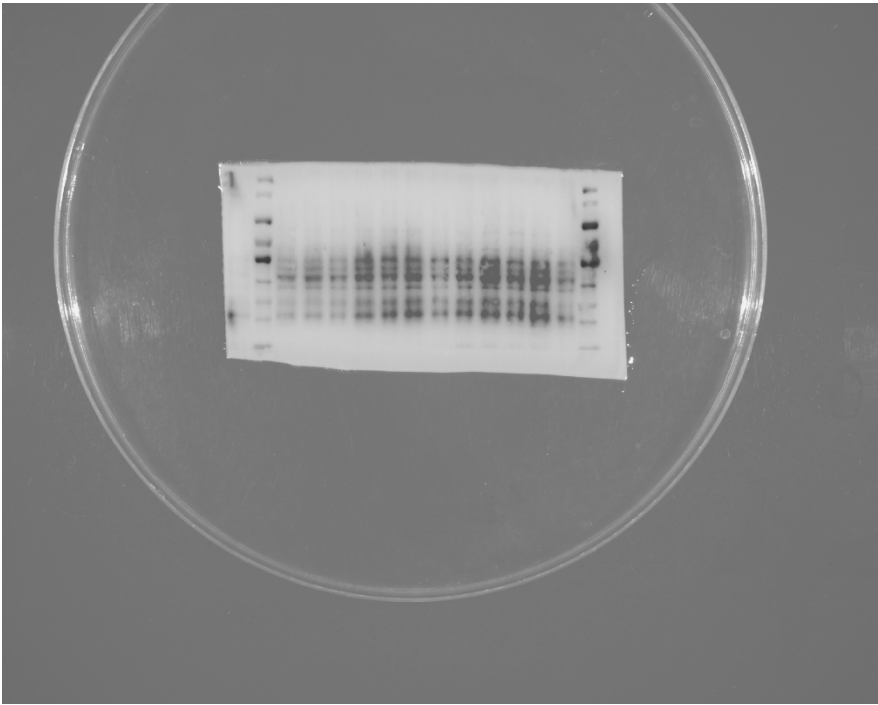

Figure S10-Kidney-β-actin

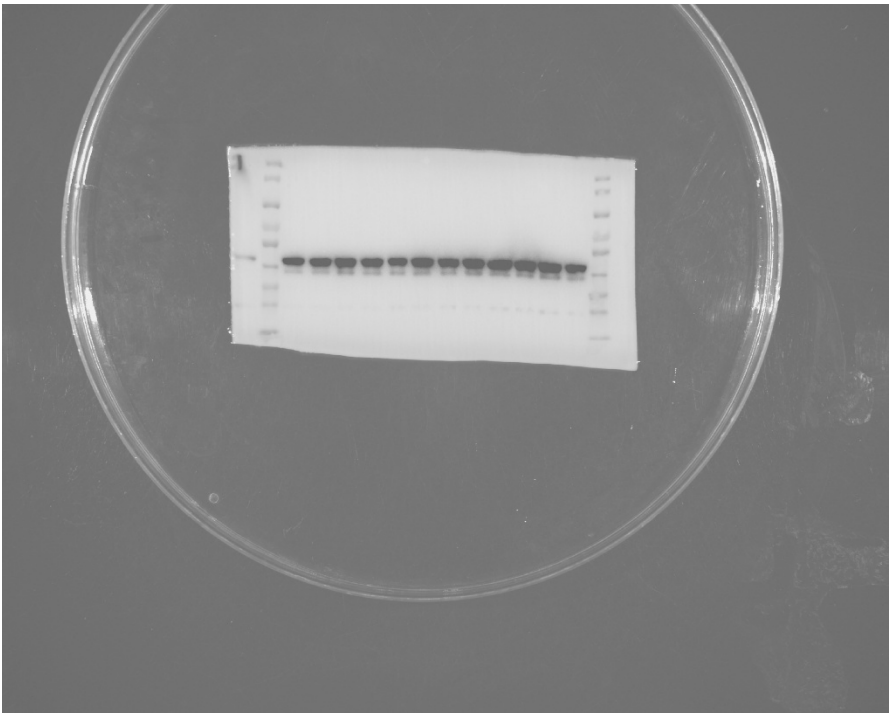

Supplement: sd2 [file 2]
